# Supplementary material
Source: PubMed Central journal article supplement (PMC7450493)
Supplement: ao0c02181_si_001.pdf [file ao0c02181_si_001.pdf]

## Supporting Information

# Optimization of Ultrasound Assisted Extraction of Functional Food Fiber from Canadian Horseweed (*Erigeron canadensis* L.)

*Sebastian Balicki<sup>†,\*</sup>, Izabela Pawlaczyk-Graja<sup>†</sup>, Roman Gancarz<sup>†</sup>, Peter Capek<sup>‡</sup>,  
Kazimiera A. Wilk<sup>†,\*</sup>*

*<sup>†</sup>Department of Engineering and Technology of Chemical Processes, Faculty of Chemistry,  
Wrocław University of Science and Technology, Wybrzeże Wyspiańskiego 27, 50-370  
Wrocław, Poland*

*<sup>‡</sup>Institute of Chemistry, Center for Glycomics, Slovak Academy of Sciences,  
Dubravská cesta 9, 845 38 Bratislava, Slovakia*

\* Corresponding authors. Department of Engineering and Technology of Chemical Processes,  
Wrocław University of Science and Technology, Wybrzeże Wyspiańskiego 27, 50-370  
Wrocław, Poland

E-mail addresses:

kazimiera.wilk@pwr.edu.pl (K.A. Wilk), Tel.: +48 71 320 28 28;

sebastian.balicki@pwr.edu.pl (S. Balicki), Tel.: +48 71 320 33-94

## **Content of the Electronic Supporting Information**

**Text S1.** Conventional isolation of the Canadian horseweed crude extracts.

**Table S1.** *I*-optimal design with corresponding variables, process parameters levels of the conducted experiment with determined energy density and coding of the raw horsewood food fibre.

**Table S2A.** Conventional process of horseweed treatment. Consumption of time, water, and input electric energy for 100 g feedstock.

**Table S2B.** UAE optimized horseweed treatment. Consumption of time, water, and input electric energy for 100 g feedstock.

**Text S2.** Analysis by GPC technique of the conventionally obtained product K.

**Figure S1.** Polyphenolic and saccharide profile of the conventional food fiber (K) with molecular weights estimation (a). Polyphenolic and saccharide profile of the ultrasound assisted optimized food fiber (**13**) with molecular weight estimation and corresponding fractions (F1-F3) (b).

**Text S3.** FT-IR analysis of the conventionally obtained product K, optimal UAE product (**13**) and its fraction F2.

**Figure S2.** FT-IR spectra of the conventional horseweed functional food fiber, ultrasound assisted optimal food fiber (**13**) and its most anticoagulant active fraction obtained after gel chromatography separation (F2).

**Text S4.** Analysis of the monosaccharide composition by the GC-MS technique.

Total number of pages: 8 (S1-S8)

Table count: 3 (S1 – S2B)

Figures count: 2 (S1-S2)

Test count: 4 (S1-S4)

**Text S1.** Conventional isolation of the Canadian horsetweed crude extracts.<sup>1</sup>

Preparation of the sample was done in the same way as described in the section *Ultrasound assisted extraction procedure*. The plant material was delivered by the manufacturer already dried and minced into appropriate particle size. It was stored in original package in dark, dry space, i.e. 15 – 20 °C, air humidity 30-40%”. Afterwards, the mixture was heated at 97 °C for 6 h, solid plant residues were filtered off and the resulting supernatant was centrifuged for 20 min, at 1850×g. The solution obtained was then neutralized with 1.0 M HCl and concentrated to a smaller volume under reduced pressure to produce a raw aqueous plant extract.

**Table S1.** *I*-optimal design with corresponding variables, process parameters levels of the conducted experiment with determined energy density and coding of the raw horseweed food fibre.

| process parameters                                                                                                                                                                                                                                                                                                                                                                                                                                                                                                                                                                                                                                             |                                        | ultrasound assisted extraction         |                                        |     |     |
|----------------------------------------------------------------------------------------------------------------------------------------------------------------------------------------------------------------------------------------------------------------------------------------------------------------------------------------------------------------------------------------------------------------------------------------------------------------------------------------------------------------------------------------------------------------------------------------------------------------------------------------------------------------|----------------------------------------|----------------------------------------|----------------------------------------|-----|-----|
| independent variable                                                                                                                                                                                                                                                                                                                                                                                                                                                                                                                                                                                                                                           | number of levels                       | 1                                      | 2                                      | 3   | 4   |
| A: time [min]                                                                                                                                                                                                                                                                                                                                                                                                                                                                                                                                                                                                                                                  | 4                                      | 10                                     | 20                                     | 40  | 60  |
| B: power [W]                                                                                                                                                                                                                                                                                                                                                                                                                                                                                                                                                                                                                                                   | 4                                      | 30                                     | 60                                     | 120 | 240 |
| constant parameters                                                                                                                                                                                                                                                                                                                                                                                                                                                                                                                                                                                                                                            |                                        |                                        |                                        |     |     |
| temperature [°C]                                                                                                                                                                                                                                                                                                                                                                                                                                                                                                                                                                                                                                               |                                        | 25                                     |                                        |     |     |
| frequency [kHz]                                                                                                                                                                                                                                                                                                                                                                                                                                                                                                                                                                                                                                                |                                        | 20                                     |                                        |     |     |
| comminution of the raw material                                                                                                                                                                                                                                                                                                                                                                                                                                                                                                                                                                                                                                |                                        | single-fractioned                      |                                        |     |     |
| solvent:dry mass ratio                                                                                                                                                                                                                                                                                                                                                                                                                                                                                                                                                                                                                                         |                                        | 12:1                                   |                                        |     |     |
| Energy density (J/cm <sup>3</sup> ) values for each combination of the independent variables                                                                                                                                                                                                                                                                                                                                                                                                                                                                                                                                                                   |                                        |                                        |                                        |     |     |
| (A <sub>1</sub> B <sub>1</sub> ) = 15                                                                                                                                                                                                                                                                                                                                                                                                                                                                                                                                                                                                                          | (A <sub>2</sub> B <sub>1</sub> ) = 30  | (A <sub>3</sub> B <sub>1</sub> ) = 60  | (A <sub>4</sub> B <sub>1</sub> ) = 90  |     |     |
| (A <sub>1</sub> B <sub>2</sub> ) = 30                                                                                                                                                                                                                                                                                                                                                                                                                                                                                                                                                                                                                          | (A <sub>2</sub> B <sub>2</sub> ) = 60  | (A <sub>3</sub> B <sub>2</sub> ) = 120 | (A <sub>4</sub> B <sub>2</sub> ) = 180 |     |     |
| (A <sub>1</sub> B <sub>3</sub> ) = 60                                                                                                                                                                                                                                                                                                                                                                                                                                                                                                                                                                                                                          | (A <sub>2</sub> B <sub>3</sub> ) = 120 | (A <sub>3</sub> B <sub>3</sub> ) = 240 | (A <sub>4</sub> B <sub>3</sub> ) = 360 |     |     |
| (A <sub>1</sub> B <sub>4</sub> ) = 120                                                                                                                                                                                                                                                                                                                                                                                                                                                                                                                                                                                                                         | (A <sub>2</sub> B <sub>4</sub> ) = 240 | (A <sub>3</sub> B <sub>4</sub> ) = 480 | (A <sub>4</sub> B <sub>4</sub> ) = 720 |     |     |
| Coding of the raw horseweed food fiber: 1' (A <sub>1</sub> B <sub>1</sub> ); 2' (A <sub>1</sub> B <sub>2</sub> ); 3' (A <sub>1</sub> B <sub>3</sub> ); 4' (A <sub>1</sub> B <sub>4</sub> ); 5' (A <sub>2</sub> B <sub>1</sub> ); 6' (A <sub>2</sub> B <sub>2</sub> ); 7' (A <sub>2</sub> B <sub>3</sub> ); 8' (A <sub>2</sub> B <sub>4</sub> ); 9' (A <sub>3</sub> B <sub>1</sub> ); 10' (A <sub>3</sub> B <sub>2</sub> ); 11' (A <sub>3</sub> B <sub>3</sub> ); 12' (A <sub>3</sub> B <sub>4</sub> ); 13' (A <sub>4</sub> B <sub>1</sub> ); 14' (A <sub>4</sub> B <sub>2</sub> ); 15' (A <sub>4</sub> B <sub>3</sub> ); 16' (A <sub>4</sub> B <sub>4</sub> ); |                                        |                                        |                                        |     |     |

**Table S2A.** Conventional process of horseweed treatment. Consumption of time, water, and input electric energy for 100 g feedstock.

| unit process            | electric device         | time requirement (h) | energy use (kWh) | cumulative energy demand (MJ) | water requirement (dm <sup>3</sup> ) |
|-------------------------|-------------------------|----------------------|------------------|-------------------------------|--------------------------------------|
|                         | maceration              | 24.0                 | —                | —                             | 3.0                                  |
|                         | hot alkaline extraction | 6.0                  | 1.37             | 4.93                          | —                                    |
|                         | cooling                 | 5.0                  | —                | —                             | 20.0                                 |
|                         | filtration              | 2.0                  | —                | —                             | —                                    |
| solid-liquid extraction | centrifugation          | 0.5                  | 0.08             | 0.29                          | —                                    |
|                         | neutralization          | 0.5                  | 0.01             | 0.04                          | —                                    |
|                         | condensation            | 4.0                  | 0.13             | 0.46                          | —                                    |
|                         | rotary evaporator       | 4.0                  | 2.85             | 10.26                         | —                                    |
|                         | heating bath            | 4.0                  | 0.24             | 0.86                          | —                                    |
|                         | membrane pump           | 4.0                  | 0.24             | 0.86                          | —                                    |
| <b>TOTAL</b>            |                         | <b>50</b>            | <b>4.7</b>       | <b>16.8</b>                   | <b>23.0</b>                          |

**Table S2B.** UAE optimized horseweed treatment. Consumption of time, water, and input electric energy for 100 g feedstock.

| unit process            | electric device                | time requirement (h) | energy use (kWh) | cumulative energy demand (MJ) | water requirement (dm <sup>3</sup> ) |
|-------------------------|--------------------------------|----------------------|------------------|-------------------------------|--------------------------------------|
|                         | maceration                     | 24.0                 | —                | —                             | 3.0                                  |
|                         | ultrasound assisted extraction | 1.0                  | 0.04             | 0.86                          | —                                    |
|                         | cooling                        | 1.0                  | 0.04             | 0.14                          | 0.5                                  |
|                         | filtration                     | 2.0                  | —                | —                             | —                                    |
| solid-liquid extraction | centrifugation                 | 0.5                  | 0.08             | 0.29                          | —                                    |
|                         | neutralization                 | 0.5                  | 0.01             | 0.04                          | —                                    |
|                         | condensation                   | 4.0                  | 0.13             | 0.46                          | —                                    |
|                         | rotary evaporator              | 4.0                  | 2.85             | 10.26                         | —                                    |
|                         | heating bath                   | 4.0                  | 0.24             | 0.86                          | —                                    |
|                         | membrane pump                  | 4.0                  | 0.24             | 0.86                          | —                                    |
| <b>TOTAL</b>            |                                | <b>41</b>            | <b>3.4</b>       | <b>12.2</b>                   | <b>3.5</b>                           |

**Text S2.** Comparison of (13) with the conventional FF (K), showed differences in the polyphenolic and saccharide fragments of both the bioproducts studied. In the case of the K product composition, four dominant fractions of molecular weights as 129.0, 26.2, 12.9 and  $4.5 \times 10^3$  ( $\text{g} \times \text{mol}^{-1}$ ) were determined (see Fig. S1 (a)). While, the optimal product (shown in Fig. S1 (b)) (13) comprised three independent fractions, i.e., F1, F2, and F3

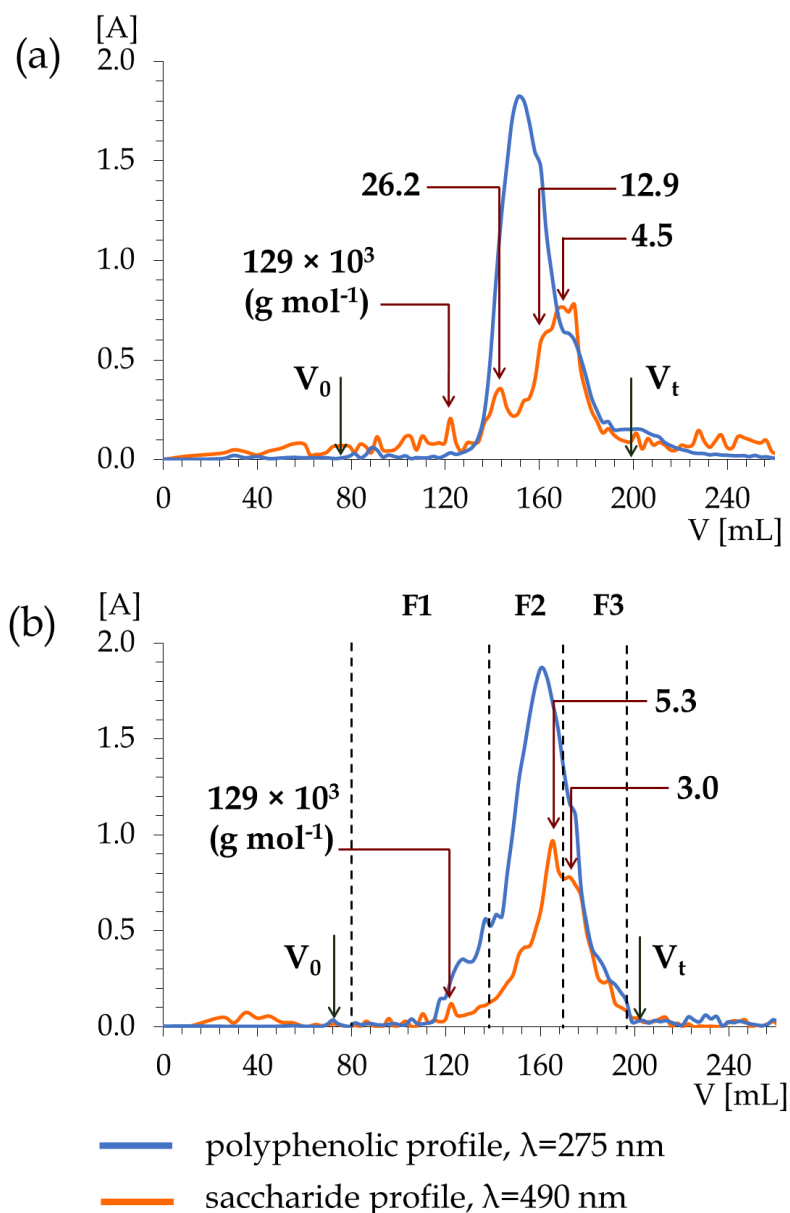

**Figure S1.** Polyphenolic and saccharide profile of the conventional food fiber (K) with molecular weights estimation (a). Polyphenolic and saccharide profile of the ultrasound assisted optimized food fiber (13) with molecular weight estimation and corresponding fractions (F1-F3) (b).

### Text S3.

FT-IR spectra were recorded by the ATR technique in the middle region of IR (4000 – 400  $\text{cm}^{-1}$ ) with a Vertex 70v spectrometer (Bruker Optics Inc., Billerica, USA).

FT-IR spectra (shown in Fig. S2) of the conventional product, optimally obtained product (**13**), and its fraction F2 with the best anticoagulant properties gave bands characteristic for the dietary fiber, i.e., polyphenolic matrices conjugated with polysaccharide chains.<sup>2</sup> In all analyzed spectra a wide band with maximum at 3290  $\text{cm}^{-1}$  characteristic for the stretching vibrations of –O-H bonds of saccharide and the phenolic parts of the glycoconjugates, was present.<sup>2</sup> Moreover, a strong and narrow band around 1600  $\text{cm}^{-1}$  indicated antisymmetric stretching vibrations typical for carbonyl groups, as well as for skeletal interactions of aromatic rings, possibly derived from uronic acids of carbohydrates and lignin species.<sup>2</sup> In each spectrum at around 1525-1515  $\text{cm}^{-1}$  a weak signal accountable for the skeletal vibrations of the ferulic acid derivatives was present. These phenolic structures are usually recognized as those of macromolecular polyphenolic matrix connected to polysaccharide chains through the ester bonds, frequently via arabinose subunits.<sup>3</sup> Finally, bands present at around 890  $\text{cm}^{-1}$  responsible for the deformation interactions of  $\beta$ -anomeric carbon atoms of saccharide glycoside bonds<sup>3</sup> were determined at 896 (K), 891 (**13**) and 886  $\text{cm}^{-1}$  (F2), respectively.

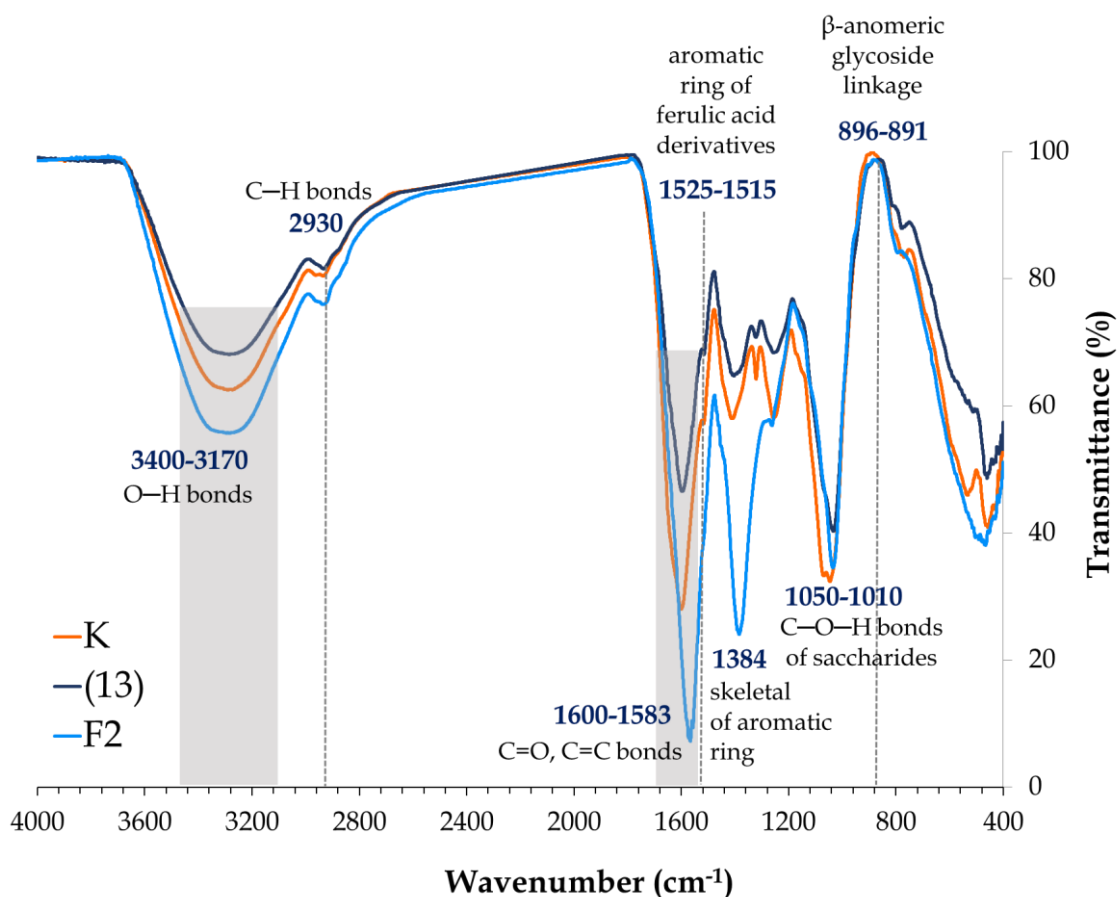

**Figure S2.** FT-IR spectra of the conventional horseweed functional food fiber, ultrasound assisted optimal food fiber (**13**) and its most anticoagulant active fraction obtained after gel chromatography separation (F2).

**Text S4.** The analysis of the monosaccharide composition was done according to the GC-MS technique,<sup>1,4</sup> with alditol acetate derivatives of the neutral monosaccharides obtained in the acidic hydrolysis of the received food fiber. This technique is routinely applied in mono-, oligo- and polysaccharides qualitative and quantitative analysis, with good precision and good accuracy. Obtained chromatograms of the mixtures were analyzed by the surface area of detected and determined peaks, based on library of mass spectra and retention times for various alditol acetate derivatives of neutral monosaccharides. Then, the surface areas were expressed as percentage of the total peak area, and recalculated to percentage of each neutral monosaccharide. The contents of uronic acids were determined with *m*-hydroxybiphenyl assay, with galacturonic acid as the standard.<sup>5</sup> A sum of both neutral monosaccharides and uronic acids was treated as carbohydrate part of particular food fiber preparation.



## References

1. Pawlaczyk, I., Czerchawski, L., Kuliczkowski, W., Karolko, B., Pilecki, W., Witkiewicz, W., Gancarz, R. Anticoagulant and anti-platelet activity of polyphenolic-polysaccharide preparation isolated from the medicinal plant *Erigeron canadensis* L. *Thromb. Res.* **2011**, 127, 328-340. <https://doi.org/10.1016/j.thromres.2010.11.031>
2. Liu, J., Bai, R., Liu, Y., Zhang, X., Kan, J., Jin, C. Isolation, structural characterization and bioactivities of naturally occurring polysaccharide–polyphenolic conjugates from medicinal plants—A review. *Int. J. Biol. Macromol.* **2018**, 107, 2242-2250 <https://doi.org/10.1016/j.ijbiomac.2017.10.097>
3. Mu, B., Wang, H., Hao, X., Wang, Q. Morphology, Mechanical Properties and Dimensional Stability of Biomass Particles/High Density Polyethylene Composites: Effect of Species and Composition. *Polymers* **2018**, 10, 308-323. <https://doi.org/10.3390/polym10030308>
4. Fox, A., Morgan, S.L., Gilbert, J. Preparation of Alditol Acetates and Their Analysis by Gas Chromatography (GC) and Mass Spectroscopy (MS). In: Biermann, C.J., McGinnis, G.D., (Eds.). *Analysis of Carbohydrates by GLC and MS*, CRC Press, Boca Raton, **2000**.
5. Blumenkrantz, N., Asboe-Hansen, O., New method for quantitative determination of uronic acids, *Anal. Biochem.* **1973**, 54, 484–489. [https://doi.org/10.1016/0003-2697\(73\)90377-1](https://doi.org/10.1016/0003-2697(73)90377-1)
